# Supplementary material for: Optimization of Medium Using Response Surface Methodology for Lipid Production by Scenedesmus sp
Source: Mar Drugs. 2014 Mar 6;12(3):1245–57. doi: 10.3390/md12031245 (PMC3967207; doi:10.3390/md12031245)
Supplement: Supplementary File 1 — Supplementary Information (PDF, 117 KB) [file marinedrugs-12-01245-s001.pdf]

## Supplementary Information

**Table S1.** Results and experimental layout of *Scenedesmus* sp. in Plackett-Burman design.

| Run | X <sub>1</sub> | X <sub>2</sub> | X <sub>3</sub> | X <sub>4</sub> | X <sub>5</sub> | X <sub>6</sub> | X <sub>7</sub> | X <sub>8</sub> | X <sub>9</sub> | Biomass<br>(g L <sup>-1</sup> ) | Lipid<br>content<br>(% dw) | Lipid<br>production<br>(mg L <sup>-1</sup> ) |
|-----|----------------|----------------|----------------|----------------|----------------|----------------|----------------|----------------|----------------|---------------------------------|----------------------------|----------------------------------------------|
| 1   | 4              | 200            | 25             | 1000           | 40             | 100            | 0.5            | 0.5            | 0.5            | 0.77                            | 29.92                      | 230.38                                       |
| 2   | 1              | 200            | 100            | 250            | 40             | 100            | 2              | 0.5            | 0.5            | 0.64                            | 27.23                      | 174.27                                       |
| 3   | 4              | 50             | 100            | 1000           | 10             | 100            | 2              | 2              | 0.5            | 0.73                            | 25.83                      | 188.56                                       |
| 4   | 1              | 200            | 25             | 1000           | 40             | 20             | 2              | 2              | 2              | 0.65                            | 32.13                      | 208.85                                       |
| 5   | 1              | 50             | 100            | 250            | 40             | 100            | 0.5            | 2              | 2              | 0.55                            | 27.79                      | 152.85                                       |
| 6   | 1              | 50             | 25             | 1000           | 10             | 100            | 2              | 0.5            | 2              | 0.63                            | 31.68                      | 199.58                                       |
| 7   | 4              | 50             | 25             | 250            | 40             | 20             | 2              | 2              | 0.5            | 0.77                            | 27.97                      | 215.37                                       |
| 8   | 4              | 200            | 25             | 250            | 10             | 100            | 0.5            | 2              | 2              | 0.79                            | 27.14                      | 214.41                                       |
| 9   | 4              | 200            | 100            | 250            | 10             | 20             | 2              | 0.5            | 2              | 0.72                            | 24.06                      | 173.23                                       |
| 10  | 1              | 200            | 100            | 1000           | 10             | 20             | 0.5            | 2              | 0.5            | 0.61                            | 27.24                      | 166.16                                       |
| 11  | 4              | 50             | 100            | 1000           | 40             | 20             | 0.5            | 0.5            | 2              | 0.71                            | 26.60                      | 188.82                                       |
| 12  | 1              | 50             | 25             | 250            | 10             | 20             | 0.5            | 0.5            | 0.5            | 0.64                            | 30.72                      | 196.58                                       |

X<sub>1</sub>—NaHCO<sub>3</sub> (g L<sup>-1</sup>); X<sub>2</sub>—KCl (mg L<sup>-1</sup>); X<sub>3</sub>—NaH<sub>2</sub>PO<sub>4</sub> · 2H<sub>2</sub>O (mg L<sup>-1</sup>); X<sub>4</sub>—NaNO<sub>3</sub> (mg L<sup>-1</sup>);  
X<sub>5</sub>—CaCl<sub>2</sub> (mg L<sup>-1</sup>); X<sub>6</sub>—MgSO<sub>4</sub> · 7H<sub>2</sub>O (mg L<sup>-1</sup>); X<sub>7</sub>—EDTA-Fe<sup>3+</sup> (mL L<sup>-1</sup>); X<sub>8</sub>—A<sub>5</sub> (mL L<sup>-1</sup>);  
X<sub>9</sub>—Soil extract (mL L<sup>-1</sup>).

As shown in Table 1, NaH<sub>2</sub>PO<sub>4</sub> · 2H<sub>2</sub>O was the most important variable impacting lipid production with *p*-value less than 0.0001, which accounted for 70.71% of the total contribution. The biomass production was increased with the increasing of phosphate concentration, which accounted for 11.40% of the total contribution. With decreasing phosphate concentration from 100 mg L<sup>-1</sup> to 25 mg L<sup>-1</sup>, the cellular lipid content in microalgae *Scenedesmus* sp. increased evidently, where *p* value was less than 0.001 and the contribution of phosphate was 55.19%. Additionally, although the lipid production was increased with the increasing the nitrogen level, the contribution of NaNO<sub>3</sub> was low with 4.47%. Finally, increasing the concentration of carbon could promote dramatically growth rate of *Scenedesmus* sp. (*p* lower than 0.0001), which accounted for 80.35%. The lipid production was also improved considerably with increasing carbon concentration, which accounted for 18.27% of the total contribution.
